# Supplementary material for: Patient characteristics, healthcare resource utilization and costs across treatment lines in diffuse large B-cell lymphoma – a German claims data study
Source: Atypon-hosted journal article supplement (doi:10.57264/cer-2024-0218), 2025-08-13
Supplement: supplementary materials.docx [file supplementary%20materials.docx]

Supplementary Table 1: Agents and codes used to assess DLBCL treatment

| **Description** | **Code** |
| --- | --- |
| Doxorubicin | ATC: L01DB01  OPS: 6001b, 60028 |
| Cyclophosphamide | ATC: L01AA01 |
| Vincristine | ATC: L01CA02 |
| Rituximab | ATC: L01XC02, L01FA01  OPS: 60016, 6001h, 6001j |
| Etoposide | ATC: L01CB01 |
| Methotrexate | ATC: L01BA01 |
| Cytarabine | ATC: L01BC01  OPS: 6002a |
| Ifosfamide | ATC: L01AA06 |
| Gemcitabine | ATC: L01BC05  OPS: 60011 |
| Oxaliplatin | ATC: L01XA03 |
| Cisplatin | ATC: L01XA01 |
| Carboplatin | ATC: L01XA02 |
| Mesna | ATC: V03AF01 |
| Bendamustine | ATC: L01AA09 |
| Polatuzumab vedotin | ATC: L01XC37, L01FX14  OPS: 600cc |
| Carmustine | ATC: L01AD01  OPS: 60033 |
| Melphalan, Melphalan flufenamide | ATC: L01AA03, L01AA10 |
| Tafasitamab | ATC: L01XC35, L01FX12  OPS: 600ff (available from 2023 only) |
| Lenalidomide | ATC: L04AX04  OPS: 6003g |
| Non-complex chemotherapy | OPS: 8542 |
| Moderately complex and intensive block chemotherapy | OPS: 8543 |
| Highly complex and intensive block chemotherapy | OPS: 8544 |
| Autologous stem cell transplantation | OPS: 54110, 8860, 88050 |
| Allogeneic stem cell transplantation | OPS: 54112, 54113, 54114, 54115, 8863, 88052, 88053, 88054, 88055 |
| Unspecified transfusion of hematopoietic stem cells | OPS: 5411x, 5411y, 8805x, 8805y |
| Use of novel therapies incl. CAR-T-cell therapy | OPS: 5936 |
| Removal and transfusion of autogenous T cells for ex vivo culture and tumor-specific in vitro preparation incl. extraction of T-cells for the production of CAR-T-cells | OPS: 541030 |
| Transfusion of leukocytes with tumor-specific and genetically in vitro processed incl. CAR-T-cells | OPS: 880224, 880234 |
| CAR-T medication tisagenlecleucel | ATC: L01XX91, L01XX71, L01XL04 |
| CAR-T medication axicabtagene ciloleucel | ATC : L01XX70, L01XL03 |
| Cell apheresis (to be considered when followed within six months by any SCT code) | OPS: 5410  ICD-10 GM: Z52 |
| Cell depletion (to be considered when followed within three months by any CAR T code) | OPS: 85440 |
| ATC: Anatomical Therapeutic Chemical Classification System to which the outpatient prescription data is transcribed to; OPS: “Operationen- und Prozedurenschlüssel”, German procedure classification for the inpatient setting which includes codes for some medical treatment | | |
